# Supplementary material for: Evaluation of Tenebrio molitor protein as a source of peptides for modulating physiological processes
Source: Royal Society of Chemistry journal article supplement (doi:10.1039/d0fo00734j), 2020-01-01
Supplement: d0fo00734j1.xlsx [file d0fo00734j1.xlsx]

## Sheet: Calibration curve
	Patrón	MW	log (MW)	mL
	L-tirosine	217.7	2.33786	21.35
	Vitamin B12	1355.37	3.13206	16.61
	Aprotinin	6512	3.81371	12.7
	Cytochrome C	12384	4.09286	10.59
	Ribonuclease A	13700	4.13672	10.02
		Intercept	35.9007
		Slope	-6.1801
		Volume	24	MW	84.2647
		Volume	15	MW	2409.53
